# Supplementary material for: A universal molecular translator for non-nucleic acid targets that enables dynamic DNA assemblies and logic operations
Source: Royal Society of Chemistry journal article supplement (doi:10.1039/c4cc07041k), 2014-01-01
Supplement: c4cc07041k1.pdf [file c4cc07041k1.pdf]

## Electronic Supplementary Information

### **A universal molecular translator for non-nucleic acid targets that enables dynamic DNA assemblies and logic operations**

Wei Tang, Shichao Hu, Huaming Wang, Yan Zhao, Na Li and Feng Liu\*

Beijing National Laboratory for Molecular Sciences, Key Laboratory of Bioorganic Chemistry and Molecular Engineering of Ministry of Education, College of Chemistry and Molecular Engineering, Peking University, Beijing 100871, China

\*Corresponding author.

liufeng@pku.edu.cn

#### **Text S1: Experimental Section**

##### **Materials and Reagents**

All HPLC-purified DNA oligonucleotides were purchased from Sangon Inc. (Shanghai, China). The DNA sequences and modifications are listed in Table S1–S6. The DNA samples were dissolved in TE buffer (50 mM Tris(hydroxymethyl)methyl aminomethane (Tris), 1 mM ethylene diamine tetraacetic acid (EDTA); pH 8.0) and stored in the dark at 4 °C. Adenosine triphosphate (ATP), thymine triphosphate (TTP), cytosine triphosphate (CTP), and guanosine triphosphate (GTP) were purchased from Sigma-Aldrich (St. Louis, MO, USA). Bovine serum albumin (BSA), fibrinogen (FIB), human serum albumin (HSA), lysozyme (LZM), and streptavidin (SA) were purchased from Sigma-Aldrich (St. Louis, MO, USA). Thrombin (THR) was purchased from Enzyme Research (South Bend, IN, USA). Strontium chloride (SrCl<sub>2</sub>) and all other chemicals employed were of analytical grade from Beijing Chemical Works (Beijing, China), and deionized water was used in all experiments.

##### **Fluorescence Measurements**

For preparation of **SO** duplex, strand **S** was mixed with strand **O** labeled by the 5'-TET and the 3'-TAMRA at 1:1 ratio in TNM buffer (50 mM Tris, 300 mM NaCl, and 5 mM MgCl<sub>2</sub>; pH 7.5) with a final concentration of 1 μM for each strand. The resulting solutions were annealed by heating at 95 °C for 5 min, and then slowly cooled down to room

temperature over 2 hours.

Fluorescence measurements were performed by using an F-7000 fluorescence spectrometry (Hitachi, Japan) at 25 °C. Sample solutions were excited at 522 nm, and the emission signal was recorded with wavelength of 539 nm. For all time-dependent fluorescence tests, appropriate volumes of DNA stock solutions were added to TNM buffer to achieve 20 nM final concentration with a total volume of 1.0 mL in the cuvettes. Afterwards, corresponding concentration of ATP and strand **I<sub>A</sub>**, with 2 μL and 5 μL of volume, respectively, were added respectively and mixed quickly within 30 s. In all graphs, time  $t = 0$  indicates the time of strand **I<sub>A</sub>** being added to the solutions.

Fluorescence measurements for CHA were performed by using a DNA Engine Opticon 2 (MJ Research, USA) at 30 °C. The reaction mixture contained 50 nM **I<sub>A</sub>**, 20 nM **SO\***, 100 nM **H1**, 500 nM **H2**, 100 nM reporter **FQ**, and varying concentrations of ATP were prepared in TNM buffer. The time-dependent fluorescence of the reaction mixture was collected every 2 minutes by a multi-mode microplate reader with excitation/emission at 490/520 nm. One normalized unit (1 n.u.) of fluorescence corresponds to the fluorescence shift caused by the release of 1 nM fluorophore-labelled strand.

### **Native Polyacrylamide Gel Electrophoresis Experiments**

In a typical experiment, the reaction mixture contained 1 μM **SO** duplex, 1 μM strand **I<sub>A</sub>**, and 2 mM ATP was incubated at room temperature for 30 min. 12% native polyacrylamide gel electrophoresis (PAGE) experiments were carried out at 110 V in 1×TBE buffer (90 mM Tris, 90 mM boric acid, 2 mM EDTA; pH 8.0) for 1 hours. After separation, PAGE gels containing DNA were stained using GelSafe Dye, and imaged by a Tanon 1600 imager (Tanon, China).

### **Agarose Gel Electrophoresis Experiments**

20 μL samples with mixture of 2.5 μM **SO\***, 2.5 μM **I<sub>A</sub>**, 1 μM **H3**, 1 μM **H4**, and varying concentrations of ATP were prepared and incubated overnight at room temperature. The 1.5% agarose gels contained 0.05 μL SYBG I dye per milliliter of gel volume were prepared by using 1×TAE buffer. The gel was run at a constant voltage of 110 V for 40 min and scanned by a Tanon 1600 imager.

### **Surface Plasmon Resonance Measurements**

All binding processes were monitored on-line by using a SPR-Navi 220A instrument (BioNavis, Tampere, Finland). Prior to modification, Au-sensor chip (BioNavis, Tampere, Finland) used was immersed in a boiling solution (30% H<sub>2</sub>O<sub>2</sub>, 28% ammonia, and deionized water in a volume ratio of 1:1:5) for 10 min. Then the cleaned sensor chip was rinsed thoroughly with deionized water, and dried by nitrogen gas prior to use. The SPR measurements were performed at 25 °C. A 0.1 μM **O**-SH solution was injected into the flow cell for on-line self-assembly on the gold surface for 20 min. Then, **S-SA** solution (the mixture of 100 nM streptavidin and 100 nM biotinlated **S**) was injected to hybridize with **O** for 25 min. At last, a premixed solution contained 1 μM **I<sub>A</sub>** and 10 mM ATP was injected for 50 min.

### **Quartz Crystal Microbalance Measurements**

All binding processes were monitored on-line by using a Q-Sense E4 QCM-D instrument (Q-Sense AB, Västra Frölunda, Sweden). Prior to modification, crystal chips (5 MHz, AT-cut) (Hrbio Co. Ltd, Beijing, China) used were immersed in a boiling solution (30% H<sub>2</sub>O<sub>2</sub>, 28% ammonia, and double distilled water in a volume ratio of 1:1:5) for 10 min. Then the cleaned chips were rinsed thoroughly with deionized water, and dried by nitrogen gas prior to use. The QCM-D measurements were performed at 20 °C with a flow rate of 10 μL min<sup>-1</sup>. A 0.1 μM **O**-SH solution was injected into the QCM-D chamber for on-line self-assembly on the gold electrode of a crystal chip for 20 min. Then, **S-SA** solution (the mixture of 100 nM streptavidin and 100 nM biotinlated **S**) was injected to hybridize with **O** for 25 min. At last, a premixed solution contained 0.5 μM **I<sub>A</sub>** and 10 mM ATP was injected for 50 min. The frequency changes were obtained at 5 overtones.

## Text S2: Fluorescence Data Processing

The 27 nt output DNA **O** is labeled with a TET fluorophore at 5' end and a TAMRA quencher at 3' end. When **O** hybridizes with **S** forming the **SO** duplex, the fluorophore and the quencher are separated by 26 base pair dsDNA (approximately 9 nm). When **O** is displaced from **SO**, a random coiling of the single-stranded DNA and hydrophobic interactions bring the TET and the TAMRA sufficiently close to each other that the fluorescence of TET is almost completely quenched.<sup>1</sup> The strand displacement kinetics can therefore be monitored by measuring the fluorescence intensity of **O** as a function of time. The fluorescence signals are normalized using the equation

$$\text{Normalized Fluorescence} = \frac{F_S - F_O}{F_{SO} - F_O},$$

where  $F_S$  is the fluorescence intensity of each sample,  $F_O$  is the fluorescence intensity of **O** lone, and  $F_{SO}$  is the fluorescence intensity of **SO**.  $F_O$  and  $F_{SO}$  are measured before the beginning of each run as the ingredients are successively added.

We presume that the proposed target-triggered strand displacement is the same as the standard toehold-based strand displacement as a simple bimolecular reaction.<sup>1</sup> When the initial concentration of invading DNA **I** is in large excess, we consider the target-triggered strand displacement as a pseudo-first-order reaction.<sup>2</sup> The Normalized Fluorescence-vs-time plots were approximately fitted into a single-exponential equation:

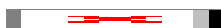

from which the  $k$  could be obtained.

### Text S3: ATP Translator

**Table S1** DNA oligonucleotide sequences used in ATP translation system.

| Name                                         | Sequence (from 5' to 3')                                                               |
|----------------------------------------------|----------------------------------------------------------------------------------------|
| O                                            | TET-AACTAATCCTCAGATCCAGCTAGTGTC-TAMRA                                                  |
| O-SH                                         | SH-C6-AACTAATCCTCAGATCCAGCTAGTGTC                                                      |
| S                                            | ATGATGTCGGATGT GACACTAGCTGGATCTGAGGATTAGTA                                             |
| S-Biotin                                     | Biotin-TEG-ATGATGTCGGATGT<br>GACACTAGCTGGATCTGAGGATTAGTA                               |
| I <sub>A</sub> (0,0,0)                       | ACTAATCCTCAGATCCAGCTAGTGTC<br><u>ACCTGGGGGAGTATTGCGGAGGAAGGT</u> ACATCCGA <sup>a</sup> |
| I <sub>A</sub> (1,0,0)                       | ACTAATCCTCAGATCCAGCTAGTGTC<br><u>ACCTGGGGGAGTATTGCGGAGGAAGGT</u> A ACATCCGA            |
| I <sub>A</sub> (2,0,0)<br>/ I <sub>A_8</sub> | ACTAATCCTCAGATCCAGCTAGTGTC<br><u>ACCTGGGGGAGTATTGCGGAGGAAGGT</u> AA ACATCCGA           |
| I <sub>A</sub> (2,0,1)                       | ACTAATCCTCAGATCCAGCTAGTGTC<br>A <u>ACCTGGGGGAGTATTGCGGAGGAAGGT</u> TAA ACATCCGA        |
| I <sub>A</sub> (2,0,2)                       | ACTAATCCTCAGATCCAGCTAGTGTC<br>AA <u>ACCTGGGGGAGTATTGCGGAGGAAGGT</u> TTAA ACATCCGA      |
| I <sub>A</sub> (3,0,0)                       | ACTAATCCTCAGATCCAGCTAGTGTC<br><u>ACCTGGGGGAGTATTGCGGAGGAAGGT</u> AAA ACATCCGA          |
| I <sub>A</sub> (4,0,0)                       | ACTAATCCTCAGATCCAGCTAGTGTC<br><u>ACCTGGGGGAGTATTGCGGAGGAAGGT</u> AAAA ACATCCGA         |
| I <sub>A</sub> (0,2,0)                       | ACTAATCCTCAGATCCAGCTAGTGTC<br>AA <u>ACCTGGGGGAGTATTGCGGAGGAAGGT</u> ACATCCGA           |
| I <sub>A_6</sub>                             | ACTAATCCTCAGATCCAGCTAGTGTC<br><u>ACCTGGGGGAGTATTGCGGAGGAAGGT</u> AA ACATCC             |
| I <sub>A_7</sub>                             | ACTAATCCTCAGATCCAGCTAGTGTC<br><u>ACCTGGGGGAGTATTGCGGAGGAAGGT</u> AA ACATCCG            |
| I <sub>A_9</sub>                             | ACTAATCCTCAGATCCAGCTAGTGTC<br><u>ACCTGGGGGAGTATTGCGGAGGAAGGT</u> AA ACATCCGAC          |
| I <sub>A_10</sub>                            | ACTAATCCTCAGATCCAGCTAGTGTC<br><u>ACCTGGGGGAGTATTGCGGAGGAAGGT</u> AA ACATCCGACA         |

<sup>a</sup> The function domains are underlined.

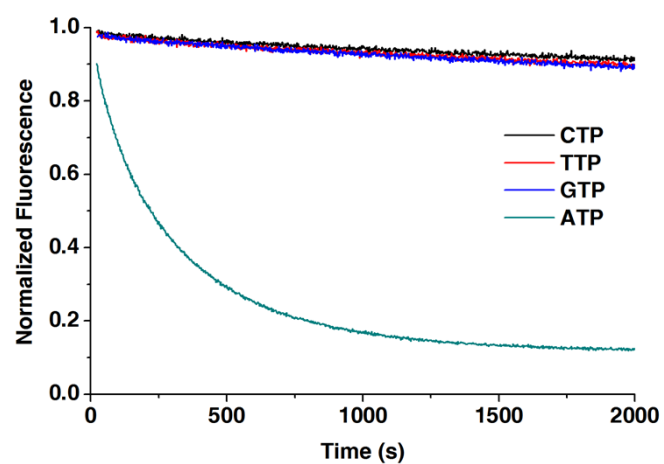

**Fig. S1** Effect of ATP, TTP, CTP, and GTP on the translation kinetics of ATP translator. The reaction mixture contained 20 nM SO duplex, 100 nM strand  $I_A$ , and 2 mM nucleoside triphosphate (ATP, TTP, CTP, or GTP).

**Text S4: Thrombin, Sr<sup>2+</sup>, and H<sup>+</sup> Translators****Table S2** DNA oligonucleotide sequences used in thrombin translation system.

| Name                                          | Sequence (from 5' to 3')                                                          |
|-----------------------------------------------|-----------------------------------------------------------------------------------|
| I <sub>T</sub> (0,0,0)                        | ACTAATCCTCAGATCCAGCTAGTGTC<br><u>AGTCCGTGGTAGGGCAGGTTGGGGTGACT</u> ACATCCGACA     |
| I <sub>T</sub> (0,1,0)                        | ACTAATCCTCAGATCCAGCTAGTGTC<br>A <u>AGTCCGTGGTAGGGCAGGTTGGGGTGACT</u> ACATCCGACA   |
| I <sub>T</sub> (1,0,0)                        | ACTAATCCTCAGATCCAGCTAGTGTC<br><u>AGTCCGTGGTAGGGCAGGTTGGGGTGACT</u> A ACATCCGACA   |
| I <sub>T</sub> (0,2,0)                        | ACTAATCCTCAGATCCAGCTAGTGTC<br>AA <u>AGTCCGTGGTAGGGCAGGTTGGGGTGACT</u> ACATCCGACA  |
| I <sub>T</sub> (2,0,0)<br>/ I <sub>T_10</sub> | ACTAATCCTCAGATCCAGCTAGTGTC<br><u>AGTCCGTGGTAGGGCAGGTTGGGGTGACT</u> AA ACATCCGACA  |
| I <sub>T</sub> (3,0,0)                        | ACTAATCCTCAGATCCAGCTAGTGTC<br><u>AGTCCGTGGTAGGGCAGGTTGGGGTGACT</u> AAA ACATCCGACA |
| I <sub>T_9</sub>                              | ACTAATCCTCAGATCCAGCTAGTGTC<br><u>AGTCCGTGGTAGGGCAGGTTGGGGTGACT</u> AA ACATCCGAC   |
| I <sub>T_11</sub>                             | ACTAATCCTCAGATCCAGCTAGTGTC<br><u>AGTCCGTGGTAGGGCAGGTTGGGGTGACT</u> AA ACATCCGACAT |

**Table S3** DNA oligonucleotide sequences used in Sr<sup>2+</sup> translation system.

| Name                                          | Sequence (from 5' to 3')                                                          |
|-----------------------------------------------|-----------------------------------------------------------------------------------|
| I <sub>S</sub> (0,0,4)                        | ACTAATCCTCAGATCCAGCTAGTGTC<br>AAAA <u>GGTTGGTGTGGTTGG</u> TTTT ACATCCGACA         |
| I <sub>S</sub> (0,0,5)                        | ACTAATCCTCAGATCCAGCTAGTGTC<br>AAAAA <u>GGTTGGTGTGGTTGG</u> TTTTT ACATCCGACA       |
| I <sub>S</sub> (0,0,6)                        | ACTAATCCTCAGATCCAGCTAGTGTC<br>AAAAAA <u>GGTTGGTGTGGTTGG</u> TTTTTT ACATCCGACA     |
| I <sub>S</sub> (0,0,7)                        | ACTAATCCTCAGATCCAGCTAGTGTC<br>AAAAAAA <u>GGTTGGTGTGGTTGG</u> TTTTTTT ACATCCGACA   |
| I <sub>S</sub> (0,1,6)                        | ACTAATCCTCAGATCCAGCTAGTGTC<br>A AAAAAA <u>GGTTGGTGTGGTTGG</u> TTTTTT ACATCCGACA   |
| I <sub>S</sub> (1,0,6)                        | ACTAATCCTCAGATCCAGCTAGTGTC<br>AAAAAA <u>GGTTGGTGTGGTTGG</u> TTTTTT A ACATCCGACA   |
| I <sub>S</sub> (0,2,6)                        | ACTAATCCTCAGATCCAGCTAGTGTC<br>AA AAAAAA <u>GGTTGGTGTGGTTGG</u> TTTTTT ACATCCGACA  |
| I <sub>S</sub> (2,0,6)<br>/ I <sub>S_10</sub> | ACTAATCCTCAGATCCAGCTAGTGTC<br>AAAAAA <u>GGTTGGTGTGGTTGG</u> TTTTTT AA ACATCCGACA  |
| I <sub>S_9</sub>                              | ACTAATCCTCAGATCCAGCTAGTGTC<br>AAAAAA <u>GGTTGGTGTGGTTGG</u> TTTTTT AA ACATCCGAC   |
| I <sub>S_11</sub>                             | ACTAATCCTCAGATCCAGCTAGTGTC<br>AAAAAA <u>GGTTGGTGTGGTTGG</u> TTTTTT AA ACATCCGACAT |

**Table S4** DNA oligonucleotide sequences used in H<sup>+</sup> translation system.

| Name                                           | Sequence (from 5' to 3')                                                |
|------------------------------------------------|-------------------------------------------------------------------------|
| I <sub>H</sub> (0,0,0)                         | ACTAATCCTCAGATCCAGCTAGTGTC<br>CCCTAACCCCTAACCCTAACCC ACATCCGACA         |
| I <sub>H</sub> (0,0,1)                         | ACTAATCCTCAGATCCAGCTAGTGTC<br>A CCCTAACCCCTAACCCTAACCC T ACATCCGACA     |
| I <sub>H</sub> (0,0,2)                         | ACTAATCCTCAGATCCAGCTAGTGTC<br>AA CCCTAACCCCTAACCCTAACCC TT ACATCCGACA   |
| I <sub>H</sub> (0,0,3)                         | ACTAATCCTCAGATCCAGCTAGTGTC<br>AAA CCCTAACCCCTAACCCTAACCC TTT ACATCCGACA |
| I <sub>H</sub> (0,1,1)<br>/ I <sub>H</sub> _10 | ACTAATCCTCAGATCCAGCTAGTGTC<br>AA CCCTAACCCCTAACCCTAACCC T ACATCCGACA    |
| I <sub>H</sub> (0,2,1)                         | ACTAATCCTCAGATCCAGCTAGTGTC<br>AAA CCCTAACCCCTAACCCTAACCC T ACATCCGACA   |
| I <sub>H</sub> (1,0,1)                         | ACTAATCCTCAGATCCAGCTAGTGTC<br>A CCCTAACCCCTAACCCTAACCC TA ACATCCGACA    |
| I <sub>H</sub> (2,0,1)                         | ACTAATCCTCAGATCCAGCTAGTGTC<br>A CCCTAACCCCTAACCCTAACCC TAA ACATCCGACA   |
| I <sub>H</sub> (0,1,2)                         | ACTAATCCTCAGATCCAGCTAGTGTC<br>AAA CCCTAACCCCTAACCCTAACCC TT ACATCCGACA  |
| I <sub>H</sub> (0,2,2)                         | ACTAATCCTCAGATCCAGCTAGTGTC<br>AAAA CCCTAACCCCTAACCCTAACCC TT ACATCCGACA |
| I <sub>H</sub> (1,0,2)                         | ACTAATCCTCAGATCCAGCTAGTGTC<br>AA CCCTAACCCCTAACCCTAACCC TTA ACATCCGACA  |
| I <sub>H</sub> (2,0,2)                         | ACTAATCCTCAGATCCAGCTAGTGTC<br>AA CCCTAACCCCTAACCCTAACCC TTAA ACATCCGACA |
| I <sub>H</sub> _11                             | ACTAATCCTCAGATCCAGCTAGTGTC<br>AA CCCTAACCCCTAACCCTAACCC T ACATCCGACAT   |
| I <sub>H</sub> _12                             | ACTAATCCTCAGATCCAGCTAGTGTC<br>AA CCCTAACCCCTAACCCTAACCC T ACATCCGACATC  |
| I <sub>T</sub> _13                             | ACTAATCCTCAGATCCAGCTAGTGTC<br>AA CCCTAACCCCTAACCCTAACCC T ACATCCGACATCA |



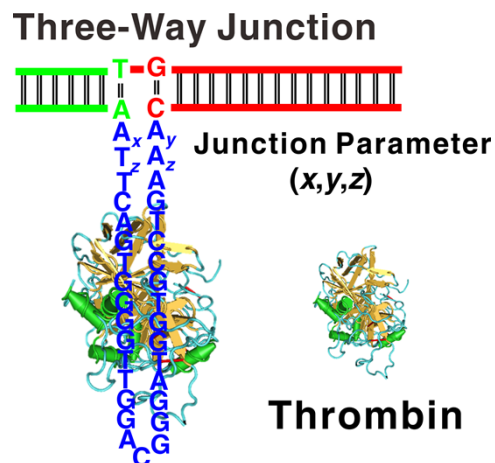

**Fig. S2** Molecular translator for thrombin. Schematic of the TWJ with the designed junction parameters.

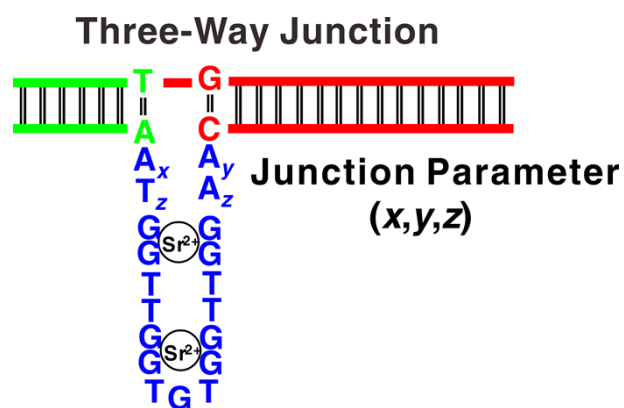

**Fig. S3** Molecular translator for  $\text{Sr}^{2+}$ . Schematic of the TWJ with the designed junction parameters.

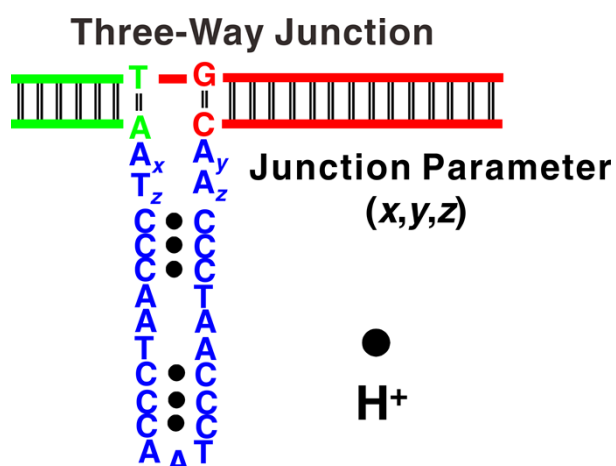

**Fig. S4** Molecular translator for  $\text{H}^+$ . Schematic of the TWJ with the designed junction parameters.

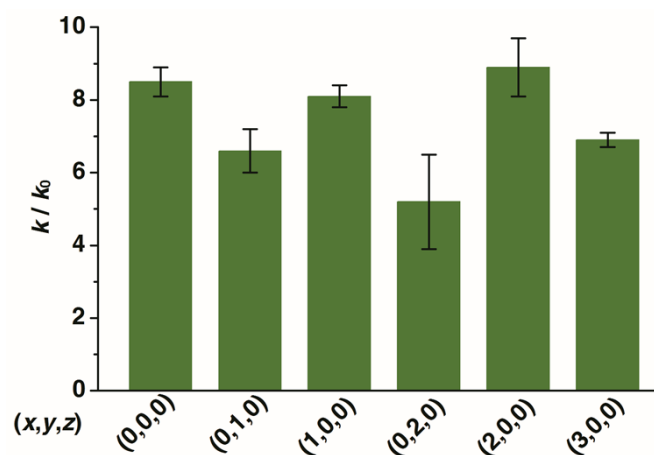

**Fig. S5** Effect of the junction parameters for thrombin translator on the ratio of reaction rate constants ( $k/k_0$ ). Initial concentrations: 20 nM **SO**, 100 nM **I<sub>T</sub>**, and 100 nM thrombin. Error bars represent the standard deviation of three measurements.

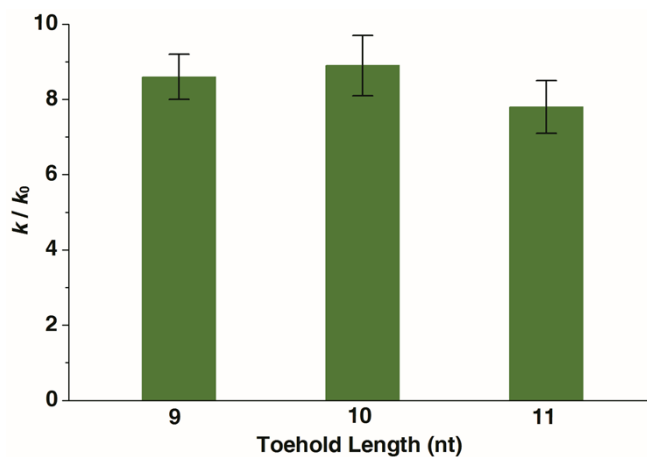

**Fig. S6** Effect of the toehold lengths for thrombin translator on the ratio of reaction rate constants ( $k/k_0$ ). Initial concentrations: 20 nM **SO**, 100 nM **I<sub>T</sub>**, and 100 nM thrombin. Error bars represent the standard deviation of three measurements.

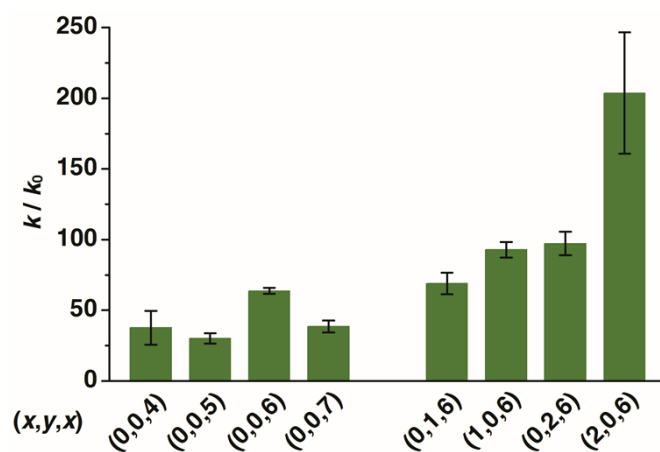

**Fig. S7** Effect of the junction parameters for  $\text{Sr}^{2+}$  translator on the ratio of reaction rate constants ( $k/k_0$ ). Initial concentrations: 20 nM **SO**, 100 nM **I<sub>S</sub>**, and 20 mM  $\text{Sr}^{2+}$ . Error bars represent the standard deviation of three measurements.

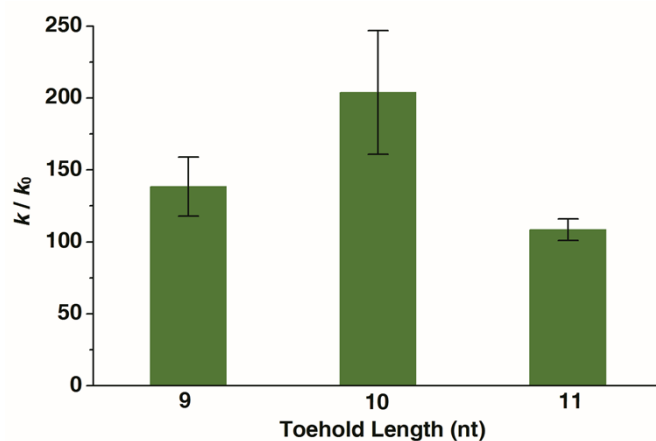

**Fig. S8** Effect of the toehold lengths for  $\text{Sr}^{2+}$  translator on the ratio of reaction rate constants ( $k/k_0$ ). Initial concentrations: 20 nM **SO**, 100 nM **I<sub>S</sub>**, and 20 mM  $\text{Sr}^{2+}$ . Error bars represent the standard deviation of three measurements.

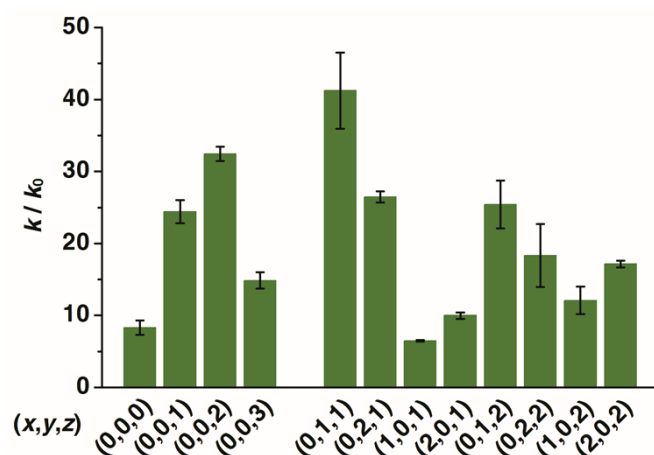

**Fig. S9** Effect of the junction parameters for  $H^+$  translator on the ratio of reaction rate constants ( $k/k_0$ ). Initial concentrations: 20 nM  $SO$ , 100 nM  $I_H$ , in pH 5.4 or 7.5. Error bars represent the standard deviation of three measurements.

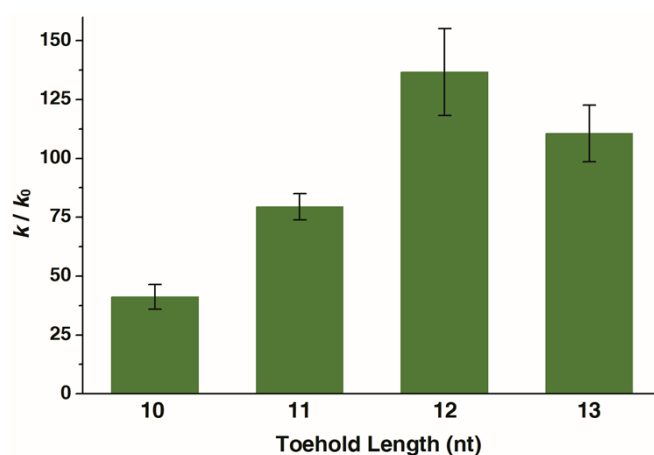

**Fig. S10** Effect of the toehold lengths for  $H^+$  translator on the ratio of the reaction rate constants ( $k/k_0$ ). Initial concentrations: 20 nM  $SO$ , 100 nM  $I_H$ , in pH 5.4 or 7.5. Error bars represent the standard deviation of three measurements.

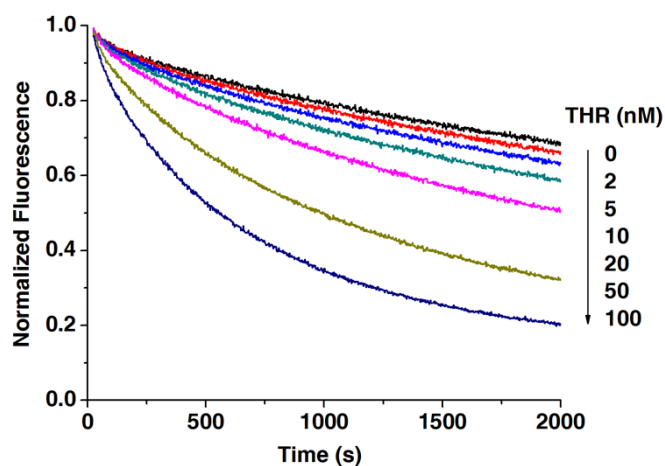

**Fig. S11** Effect of the concentrations of thrombin on the translation kinetics. In a typical experiment, the **SO** duplex (1 mL, 20 nM) was placed in a cuvette, and then both **I<sub>T</sub>** (5  $\mu$ L, 20  $\mu$ M) and thrombin (THR) (2  $\mu$ L at the proper concentration) were added and mixed quickly within 30 s to initiate the reaction.

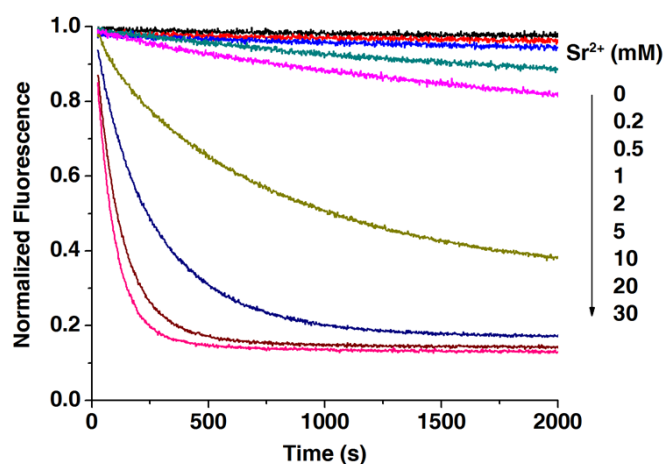

**Fig. S12** Effect of the concentrations of  $\text{Sr}^{2+}$  on the translation kinetics. In a typical experiment, the **SO** duplex (1 mL, 20 nM) was placed in a cuvette, and then both **I<sub>S</sub>** (5  $\mu$ L, 20  $\mu$ M) and  $\text{Sr}^{2+}$  (2  $\mu$ L at the proper concentration) were added and mixed quickly within 30 s to initiate the reaction.

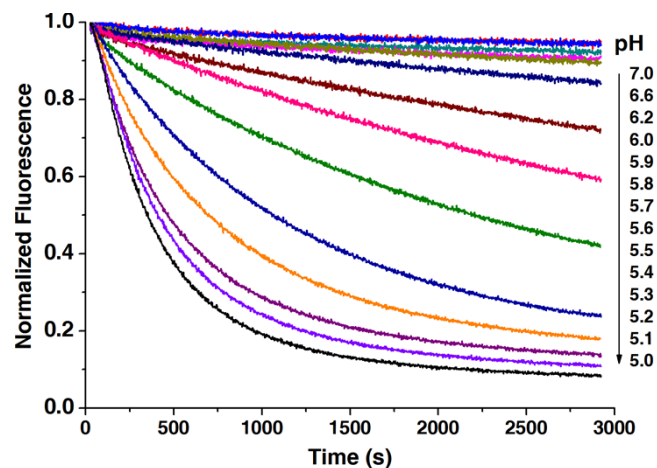

**Fig. S13** Effect of the concentrations of  $H^+$  on the translation kinetics. In a typical experiment, the **SO** duplex (1 mL, 20 nM) was placed in a cuvette with various pH solutions, and then **I<sub>H</sub>** (5  $\mu$ L, 20  $\mu$ M) was added and mixed quickly within 30 s to initiate the reaction.

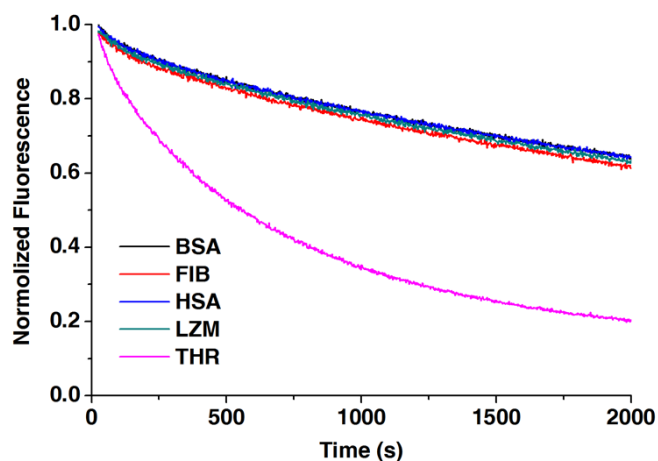

**Fig. S14** Effect of BSA, FIB, HSA, LZM, and THR on the translation kinetics of THR translator. The reaction mixture contained 20 nM **SO** duplex, 100 nM strand **I<sub>T</sub>**, and 100 nM protein.

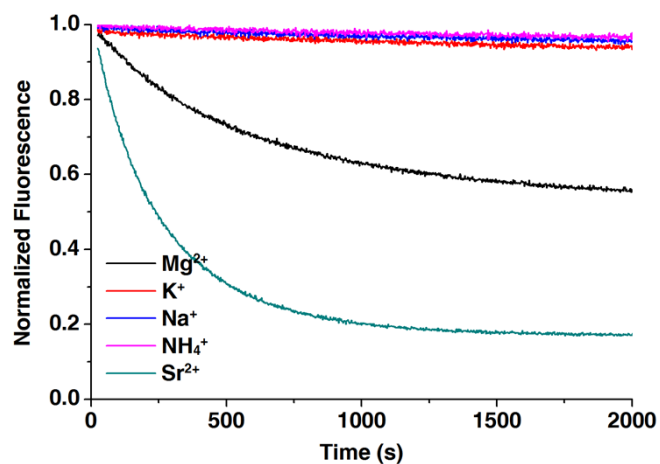

**Fig. S15** Effect of Mg<sup>2+</sup>, K<sup>+</sup>, Na<sup>+</sup>, NH<sub>4</sub><sup>+</sup>, and Sr<sup>2+</sup> on the translation kinetics of Sr<sup>2+</sup> translator. The reaction mixture contained 20 nM SO duplex, 100 nM strand I<sub>S</sub>, and 10 mM ion.

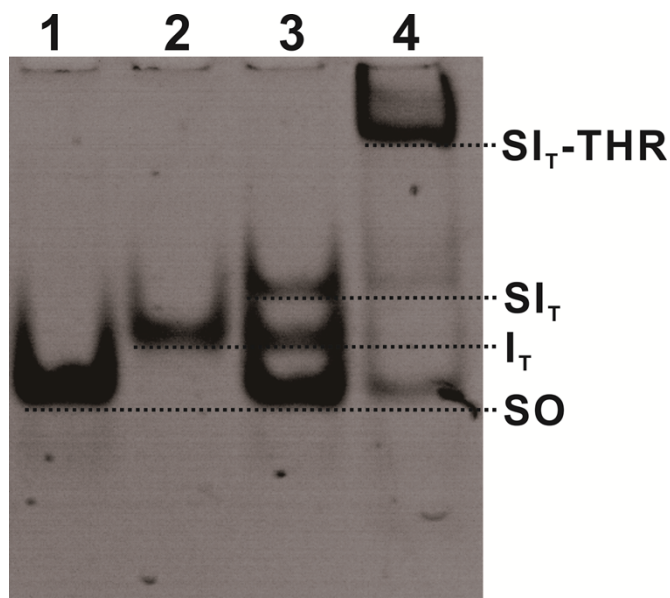

**Fig. S16** Native PAGE (12%) analysis. Lane 1: 1 μM SO, lane 2: 1 μM I<sub>T</sub>, lane 3: 1 μM SO and 1 μM I<sub>T</sub>, lane 4: 1 μM SO, 1 μM I<sub>T</sub>, and 100 nM thrombin.

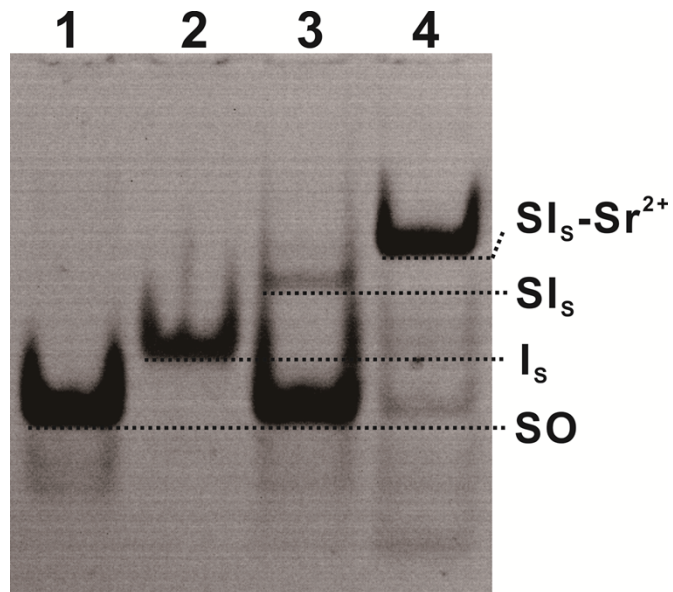

**Fig. S17** Native PAGE (12%) analysis. Lane 1: 1  $\mu$ M SO, lane 2: 1  $\mu$ M  $I_s$ , lane 3: 1  $\mu$ M SO and 1  $\mu$ M  $I_s$ , lane 4: 1  $\mu$ M SO, 1  $\mu$ M  $I_s$ , and 20 mM  $Sr^{2+}$ .

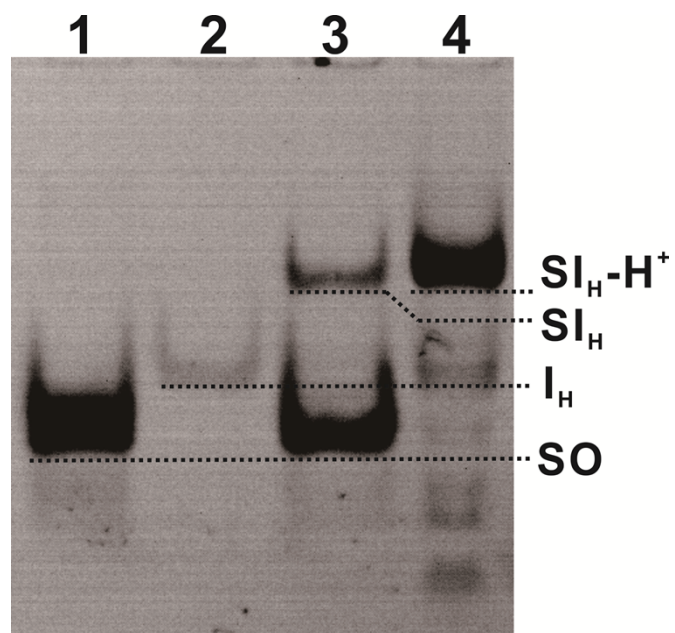

**Fig. S18** Native PAGE (12%) analysis. Lane 1: 1  $\mu$ M SO, lane 2: 1  $\mu$ M  $I_H$ , lane 3: 1  $\mu$ M SO and 1  $\mu$ M  $I_H$  at pH 7.5, lane 4: 1  $\mu$ M SO, 1  $\mu$ M  $I_H$  at pH 5.4.



## Text S5: Molecular Translator-Directed CHA and HCR

**Table S5** DNA oligonucleotide sequences used in CHA and HCR system.

| Name | Sequence (from 5' to 3')                                                |
|------|-------------------------------------------------------------------------|
| O*   | CACCTCACTCCACTCTACTAATCC TCAGATCCAGCTAGTGTC                             |
| H1   | GGATTAGTAGAGTGGAGTGAGGTGACCCGCACTTCCACCTCAC<br>TCCACTCTCACCCTCATTTCACTC |
| H2   | GTGAGGTGGAAGTGCGGGTCACCTCACTCCACTCTACCCGCACTTC                          |
| H3   | GGATTAGTAGAGTGGAGTGAGGTGCCTACCTTCACCTCACTCCACTCT                        |
| H4   | CACCTCACTCCACTCTACTAATCCAGAGTGGAGTGAGGTGAAGGTAGG                        |
| F    | FAM-GAGTGAAATGAGGGTGAGAGTGGA                                            |
| Q    | CACCCTCATTTCACTC-Dabcyl                                                 |

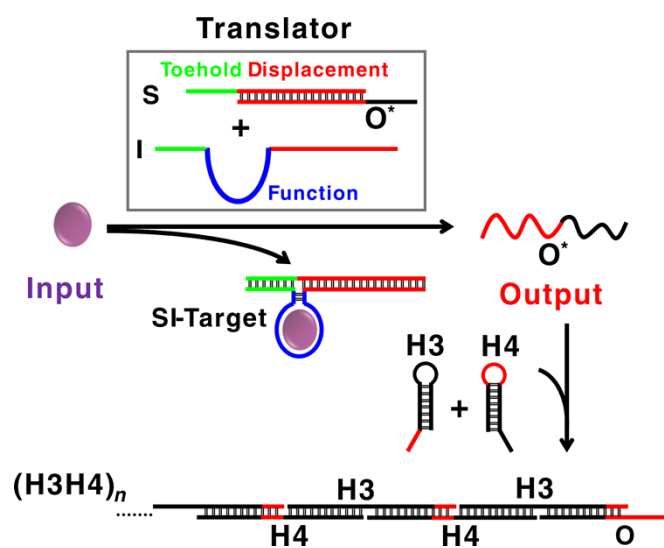

Fig. S19 Principle of the translator-directed HCR.

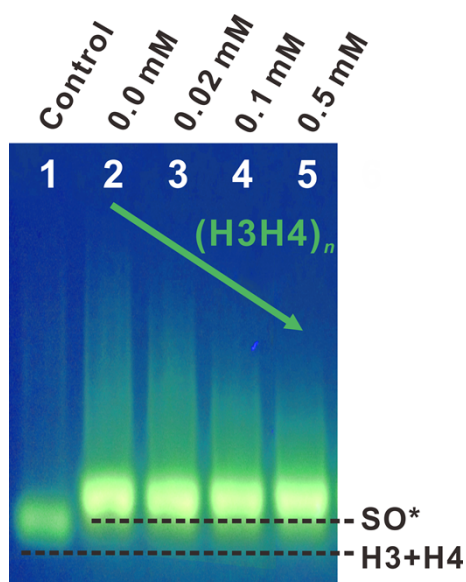

Fig. S20 Agarose gel electrophoresis (1.5%) analysis of the translator-directed HCR. The test solutions contained  $2.5 \mu\text{M } SO^*$ ,  $2.5 \mu\text{M } I_A$ ,  $1 \mu\text{M } H3$ ,  $1 \mu\text{M } H4$ , and varying ATP concentrations were incubated at room temperature overnight, respectively. Control test solution contained  $1 \mu\text{M } H3$  and  $1 \mu\text{M } H4$ .

## Text S6: Logic Gates

**Table S6** DNA oligonucleotide sequences used in logic gate systems.

| Name            | Sequence (from 5' to 3')                                                |
|-----------------|-------------------------------------------------------------------------|
| O               | TET-AACTAATCCTCAGATCCAGCTAGTGTC-TAMRA                                   |
| S <sub>x</sub>  | CCGGTTTCACATTACTTTTGCTGCCTTACGAGTCTTC                                   |
| S <sub>y</sub>  | ACATCCGACTAAACCTAAACATAACCGAAGACTCGTAAGGCAGCAAA<br>AGTAA                |
| S <sub>z</sub>  | GGTTATGTTTAGGTTTAGTCCGGATGTGACACTAGCTGGATCTGAGGAT<br>TAGT               |
| I <sub>x</sub>  | GAAGACTCGTAAGGCAGCAAAAGTAAAGTCCGTGGTAGGGCAGGTTG<br>GGTGACTAATGTGAAACCGG |
| I <sub>y</sub>  | TACGAGTCTTCAAAAAAGGTTGGTGTGGTTGGTTTTTTAAAGGTTATGTT<br>TAGGTTTAGTCGGATGT |
| I <sub>z</sub>  | ACTAATCCTCAGATCCAGCTAGTGTCACCTGGGGGAGTATTGCGGAGG<br>AAGGTTTACATCCGAC    |
| S <sub>OR</sub> | ATGATGTCCGGATGTGACACTAGCTGGATCTGAGGATTAGTA                              |
| I <sub>T</sub>  | ACTAATCCTCAGATCCAGCTAGTGTCAGTCCGTGGTAGGGCAGGTTGG<br>GGTGACTAAACATCCGACA |
| I <sub>S</sub>  | ACTAATCCTCAGATCCAGCTAGTGTCAAAAAAGGTTGGTGTGGTTGGT<br>TTTTTAAACATCCGACA   |
| I <sub>A</sub>  | ACTAATCCTCAGATCCAGCTAGTGTCACCTGGGGGAGTATTGCGGAGG<br>AAGGTTTACATCCGA     |

## References

- (1) Yurke, B.; Mills, A. P. *Genet. Program. Evol. Mach.* **2003**, *4*, 111.
- (2) Chen, X. *J. Am. Chem. Soc.* **2012**, *134*, 263.
